# Supplementary material
Source: ML conference proceedings conference paper supplement (https://openaccess.thecvf.com/content/ICCV2025/html/Qiu_FreeScale_Unleashing_the_ICCV_2025_paper.html)

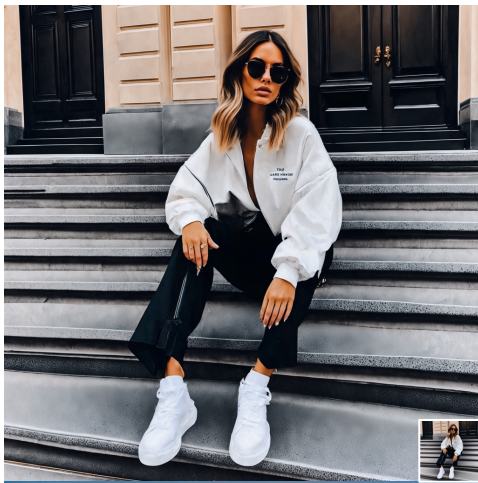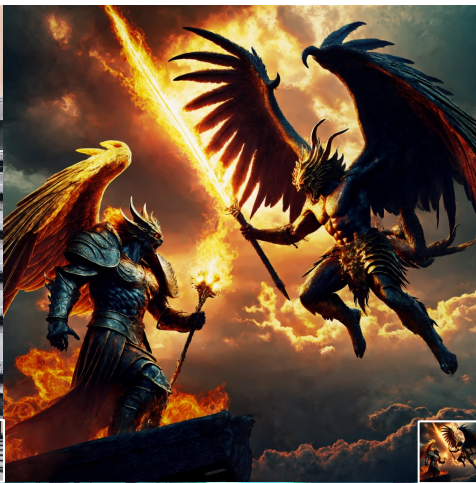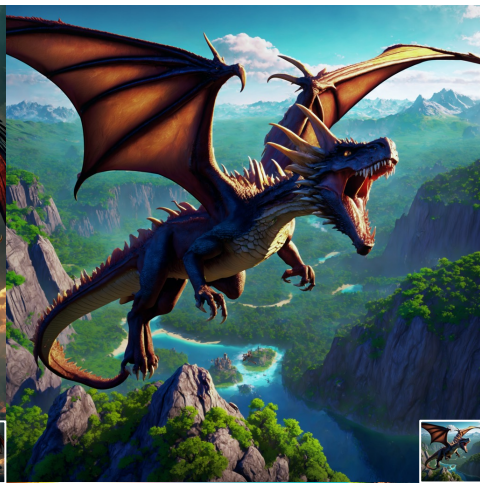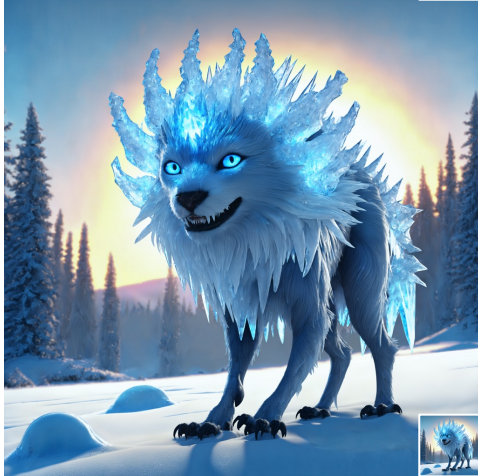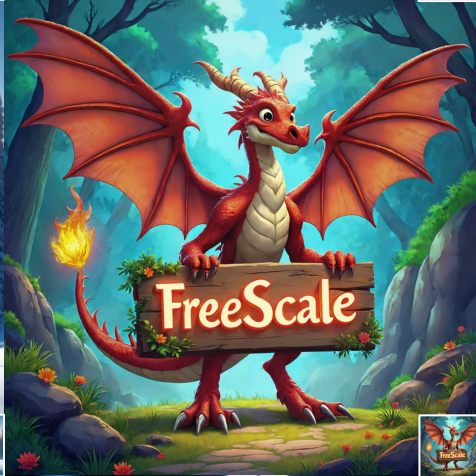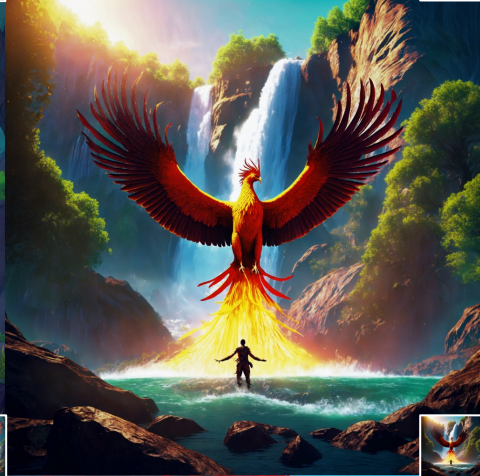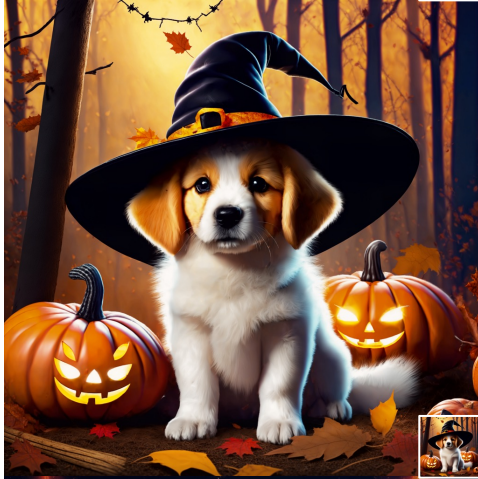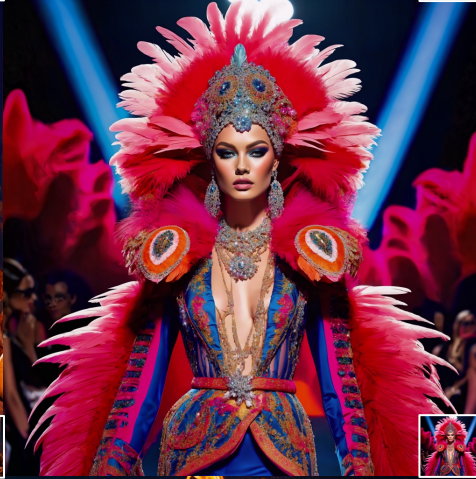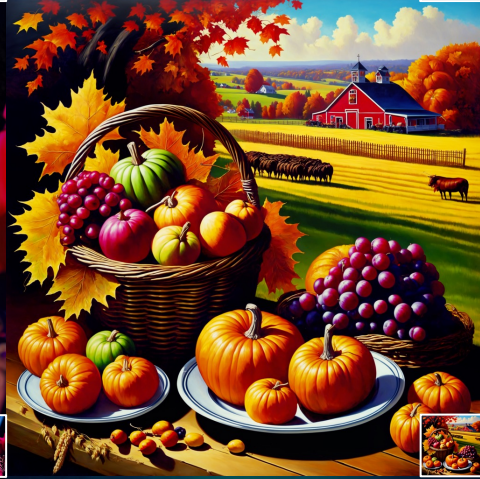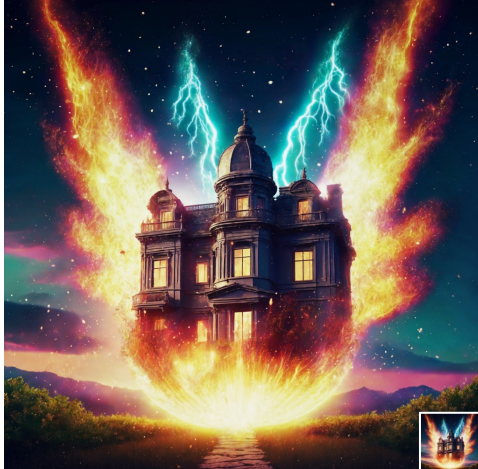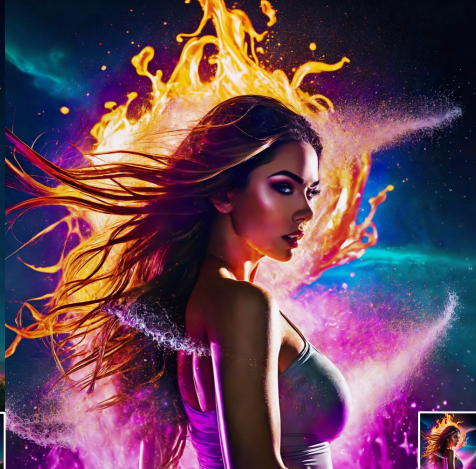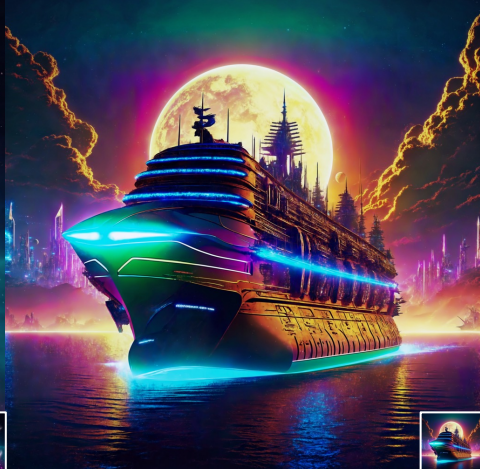

Supplement: Supplementary file 2 [file fig_8192.pdf › FreeScale_Supplementar_Material/selected 8k images/fig_8192.pdf]
